# Supplementary material for: Sodium Accumulation and Blood Capillary Rarefaction in the Skin Predispose Spontaneously Hypertensive Rats to Salt Sensitive Hypertension
Source: MDPI journal article supplement (doi:10.3390/biomedicines10020376), 2022-02-04
Supplement: s1 [file s1]

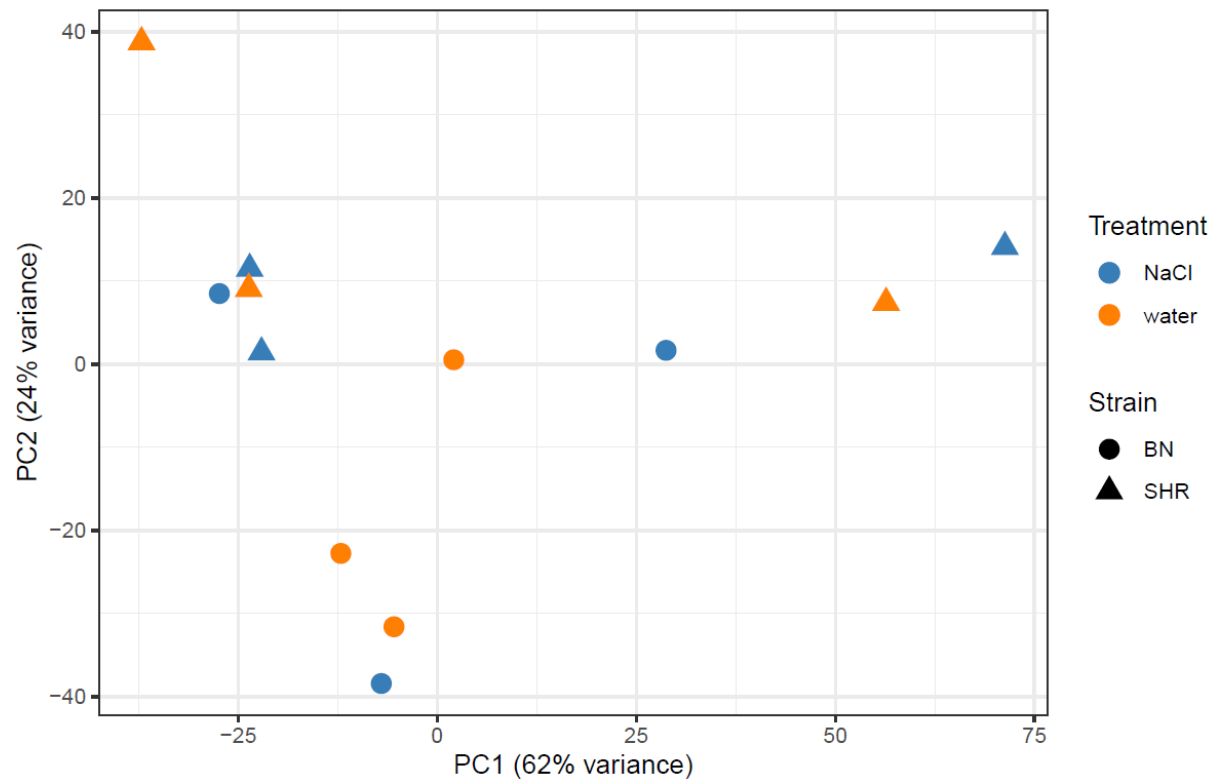

**Figure S1.** Principal component analysis (PCA) based on expression of 500 genes with highest variance. Percentage in axis labels represents ratio of total variance explained.
